# Supplementary material for: Ultra-preconcentration and determination of organophosphorus pesticides in soil samples by a combination of ultrasound assisted leaching-solid phase extraction and low-density solvent based dispersive liquid–liquid microextraction
Source: Royal Society of Chemistry journal article supplement (doi:10.1039/c5ra11959f), 2015-01-01
Supplement: c5ra11959f1.pdf [file c5ra11959f1.pdf]

**Fig. S1.** Selection of extracting and disperser/eluting solvents in USAL-SPE-LDS-DLLME. USL conditions: soil sample weight, 2 gr; spiked concentration, 50 ng g<sup>-1</sup>; leaching solvent volume, 2 mL (Methanol); ultrasound radiation time, 2 min; centrifugation time, 5 min; SPE Conditions: water sample volume, 50 mL; flow rate, 15 mL min<sup>-1</sup>; disperser/eluting solvent volume, 1 mL; LDS-DLLME conditions: extraction solvent volume, 10 μL; aqueous solution volume, 5 mL; extraction time, 1 min; centrifugation time, 2 min.

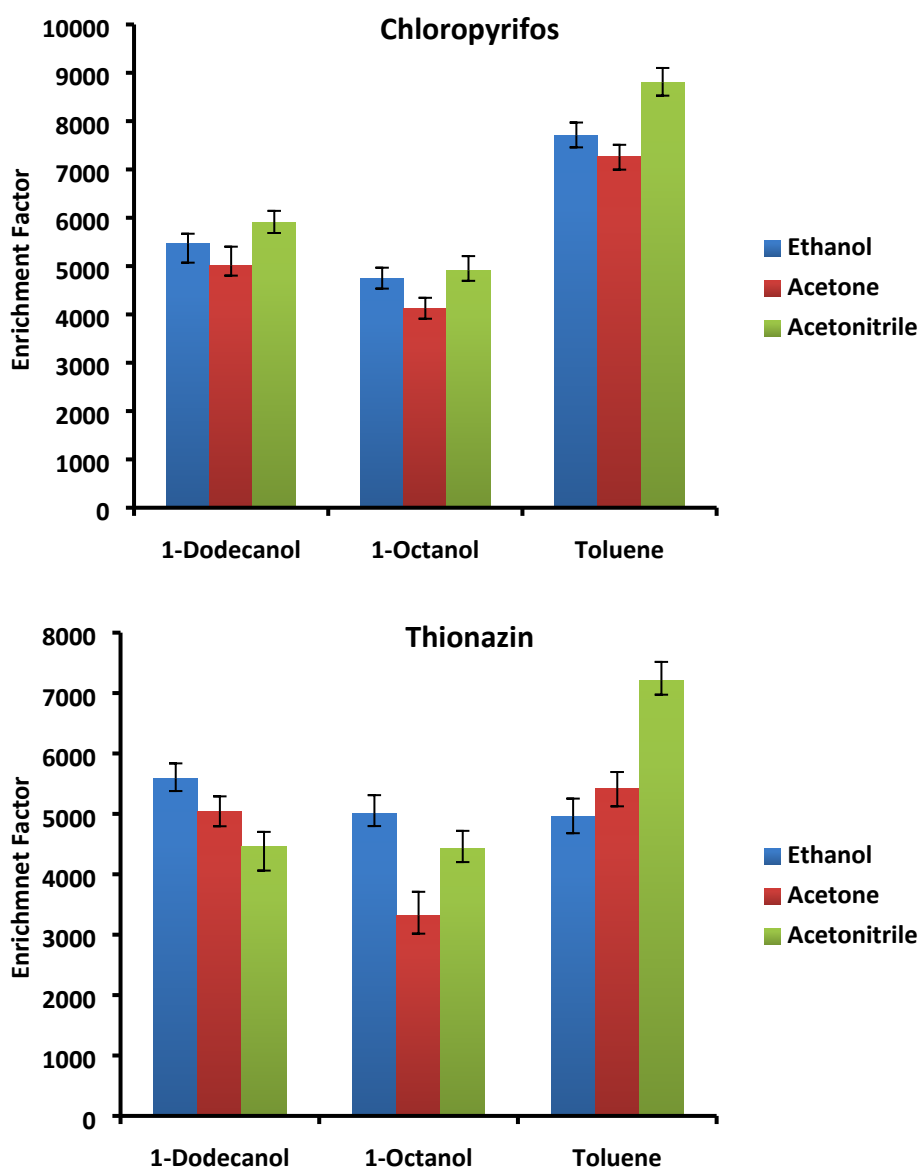

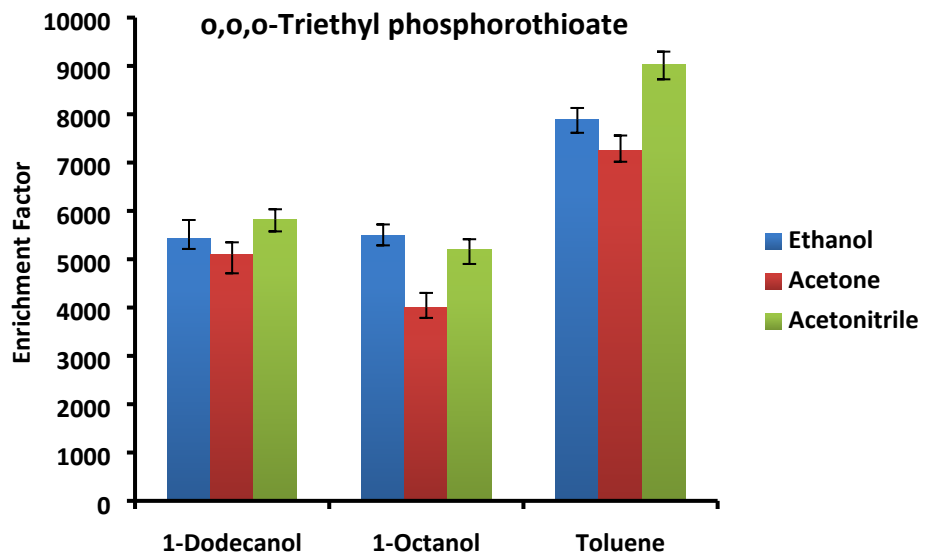

**Fig. S2.** Standardized ( $P = 0.05$ ) Pareto chart, representing the estimated effects of parameters and parameter interactions on enrichment factor

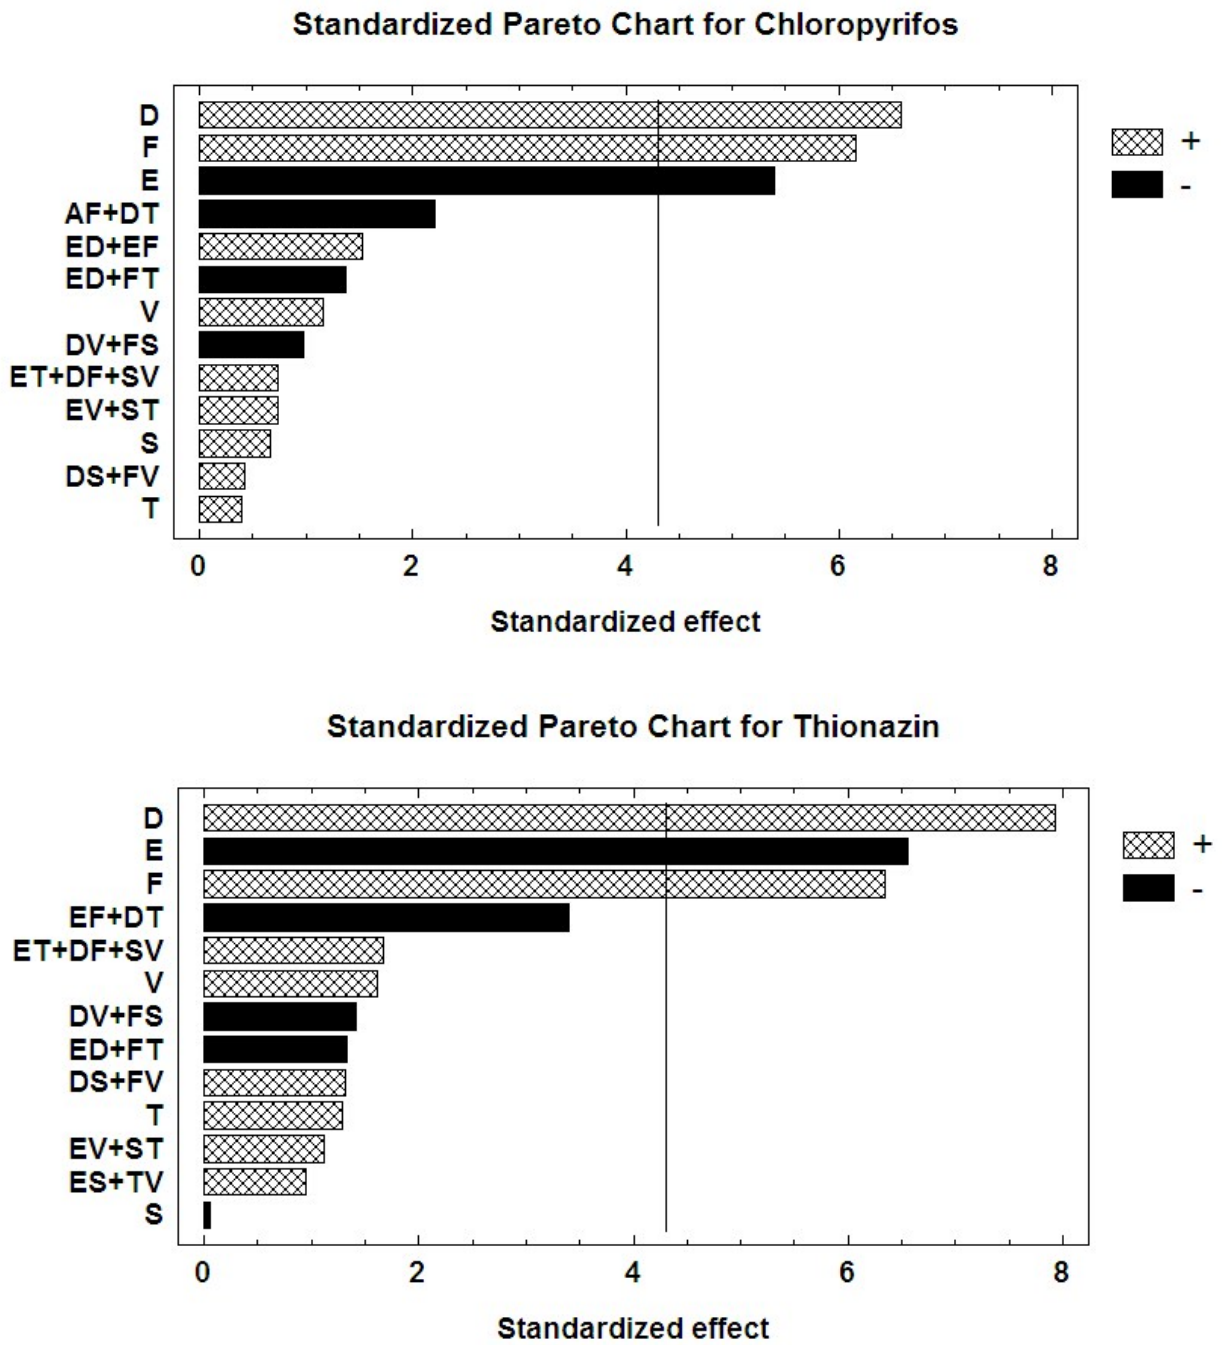

Standardized Pareto Chart for o,o,o-Triethyl phosphorothioate

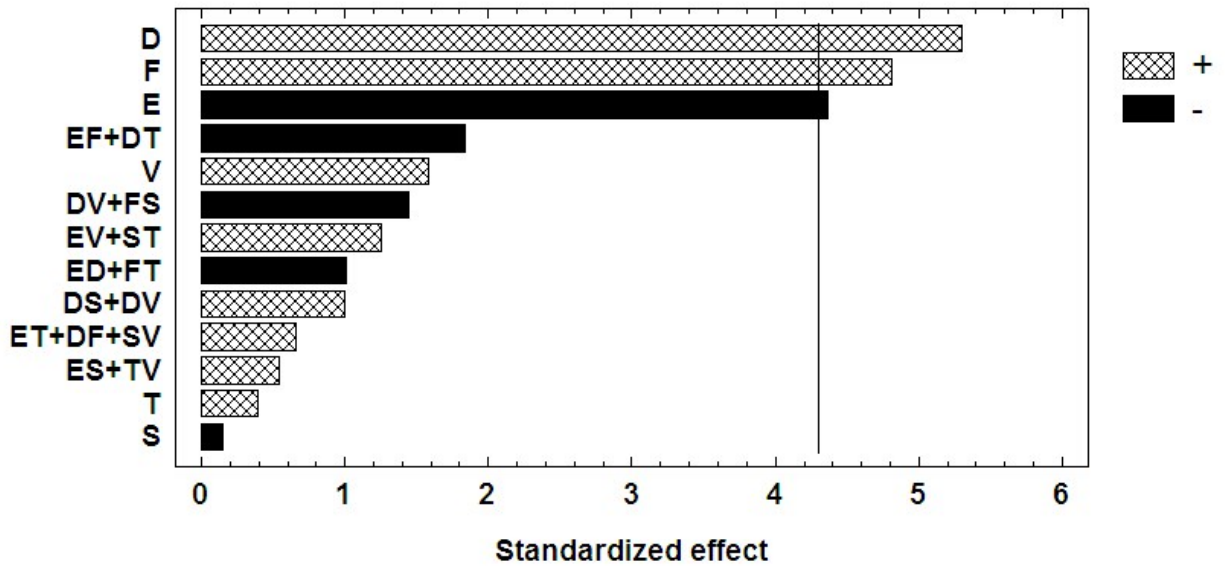

**Fig. S3.** Estimated response surfaces with related contours for (A) Chloropyrifos, (B) Thionazin and (C) o,o,o-Triethyl phosphorothioate by plotting enrichment factor versus a: extraction solvent volume (E,  $\mu\text{L}$ ) and dispersive solvent volume (D, mL); b: extraction solvent volume (E) and Flow rate of sample solution through solid phase (F,  $\text{mL min}^{-1}$ ); c: dispersive solvent volume (D) and Flow rate of sample solution through solid phase (F);

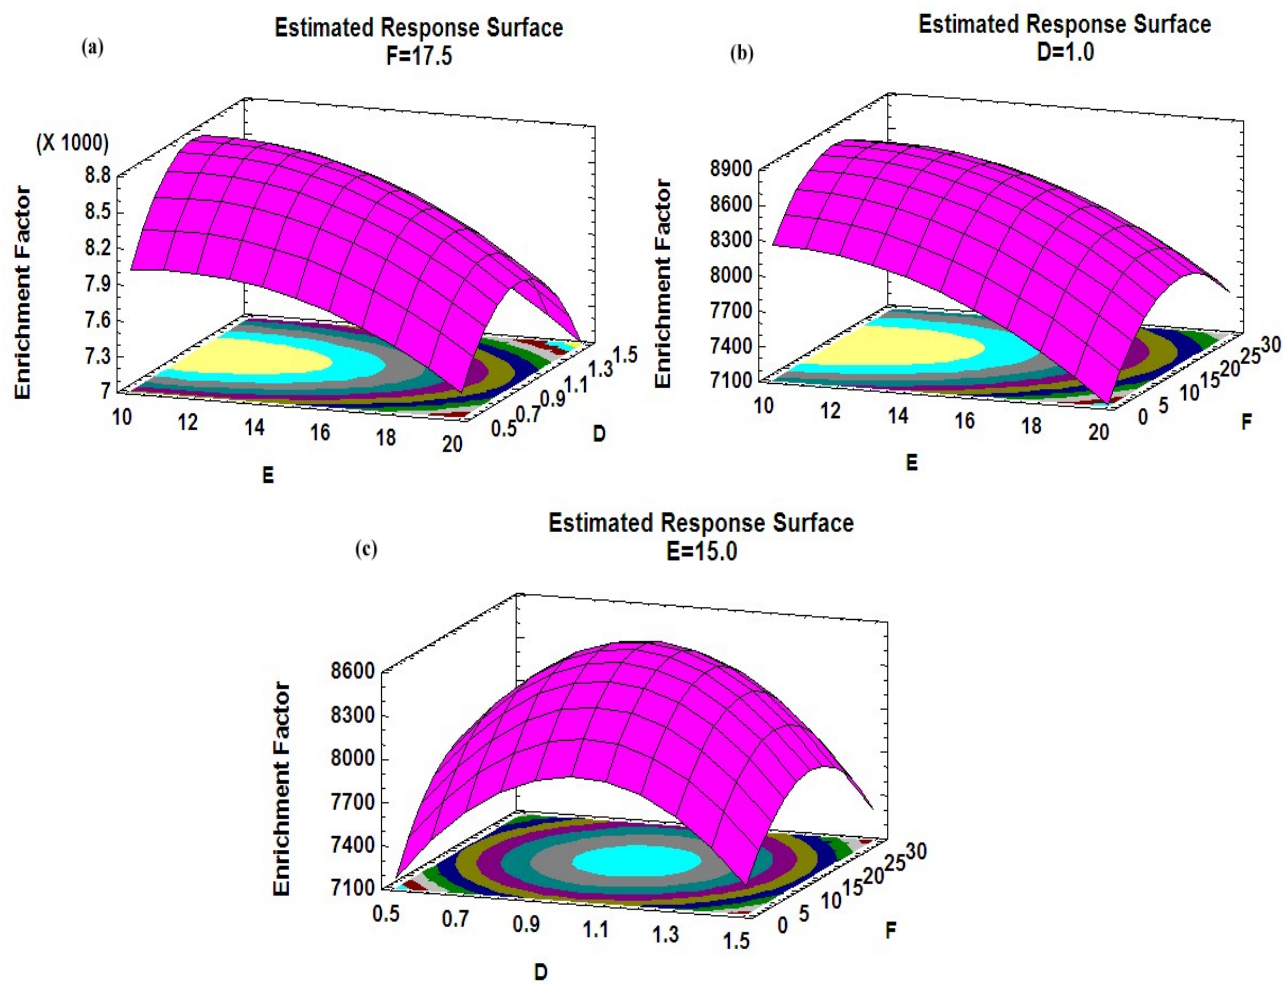

**(A) Chloropyrifos**

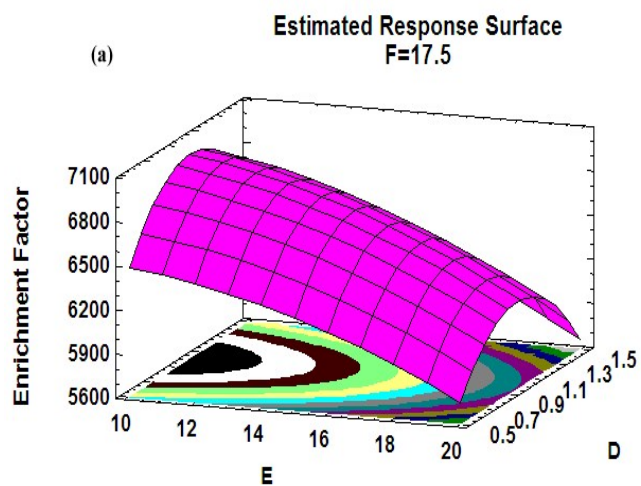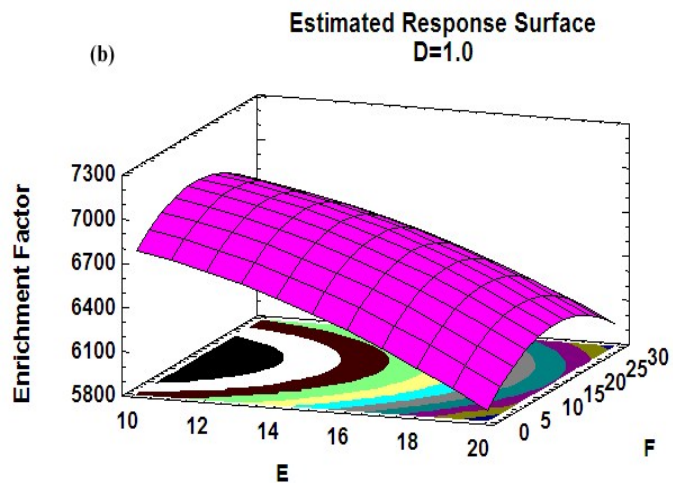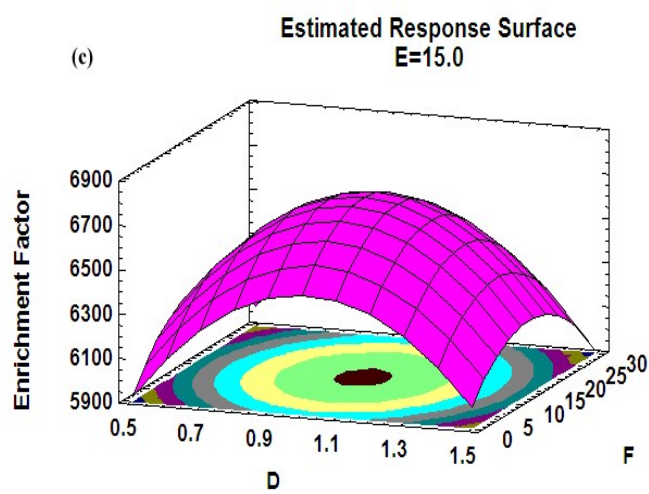

**(B) Thionazin**

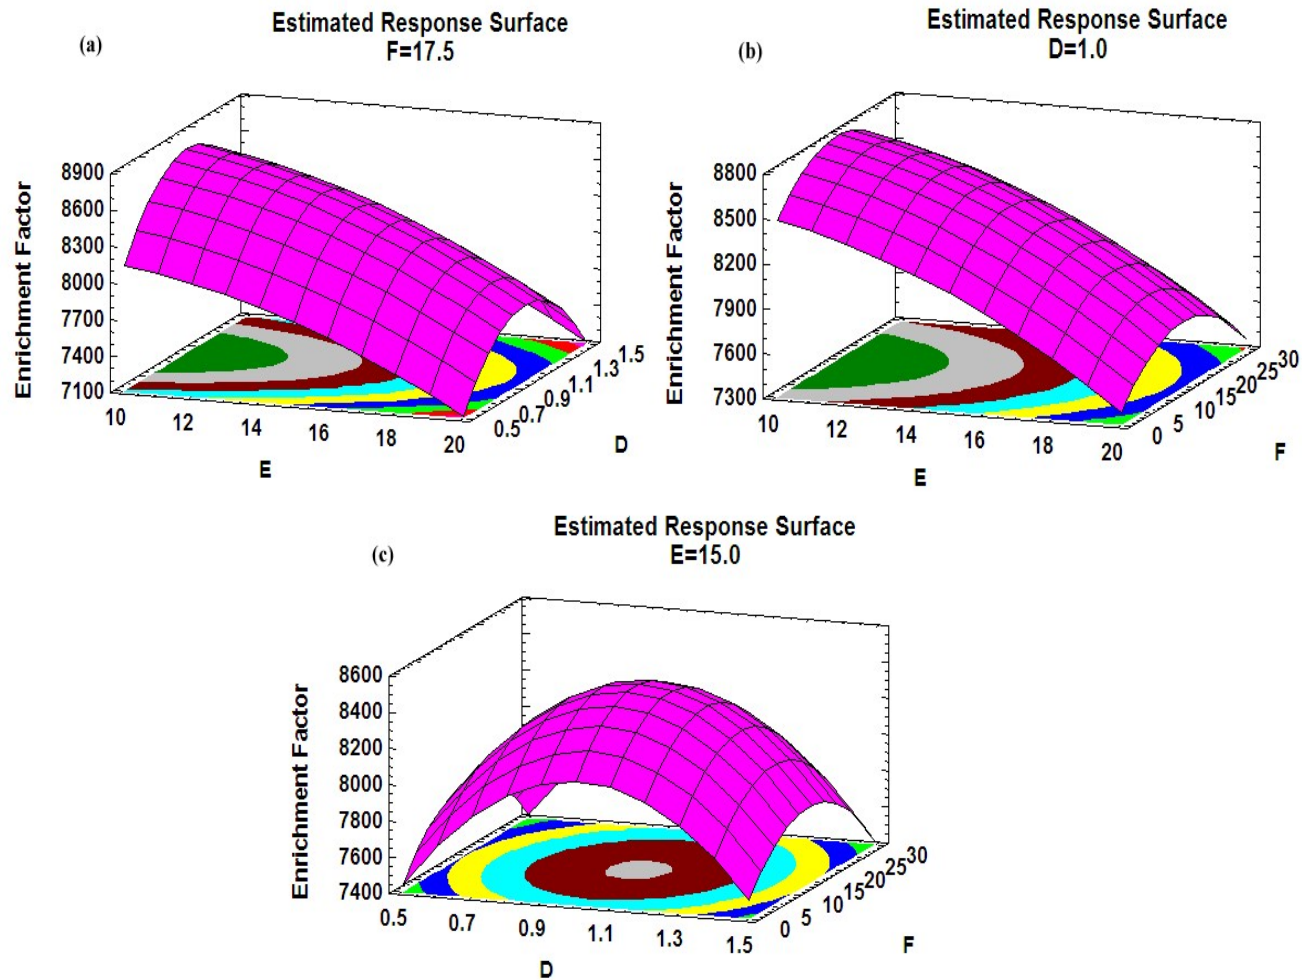

(C) o,o,o-Triethyl phosphorothioate
